# Supplementary material for: Modelling the development and decay of cryoconite holes in northwestern Greenland
Source: Copernicus journal article supplement (doi:10.5194/tc-17-3309-2023), 2023-08-17
Supplement: Supplementary file 1 [file tc-17-3309-2023-supplement.pdf]

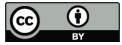

*Supplement of*

## **Modelling the development and decay of cryoconite holes in northwestern Greenland**

**Yukihiko Onuma et al.**

*Correspondence to:* Yukihiko Onuma (onuma.yukihiko@jaxa.jp, yonuma613@gmail.com) and Koji Fujita (cozy@nagoya-u.jp)

The copyright of individual parts of the supplement might differ from the article licence.

## **SUPPLEMENTARY MATERIAL**

### **Contents of this file**

Table S1

5 Figures S1 to S2

Table S1 shows approximation equation parameters for clear and cloudy sky conditions derived from spectral flux extinction coefficient observed by Cooper et al. (2021). Figures S1 and S2 show spectral solar radiation under clear and cloudy skies simulated with a radiative transfer model for the atmosphere–snow/ice system (Aoki et al., 1999; 2000), and broadband flux extinction coefficient of bare ice as a function of solar zenith angle, respectively.

15 **Table S1: Approximation equation parameters fitted by a power regression equation  $\overline{k_e}(x) = ax^b$  for clear and cloudy sky conditions and employed data sets of  $k_e(\lambda)$  for Layer A and Layer B reported by Cooper et al. (2021).  $R^2$  is the determination coefficient.**

| Sky condition | Ice layer | $a$    | $b$      | $R^2$ |
|---------------|-----------|--------|----------|-------|
| Clear sky     | Layer-A   | 1.9167 | -0.61328 | 0.995 |
| Cloudy sky    | Layer-A   | 1.6203 | -0.51923 | 0.991 |
| Clear sky     | Layer-B   | 1.8322 | -0.62486 | 0.996 |
| Cloudy sky    | Layer-B   | 1.529  | -0.53297 | 0.993 |

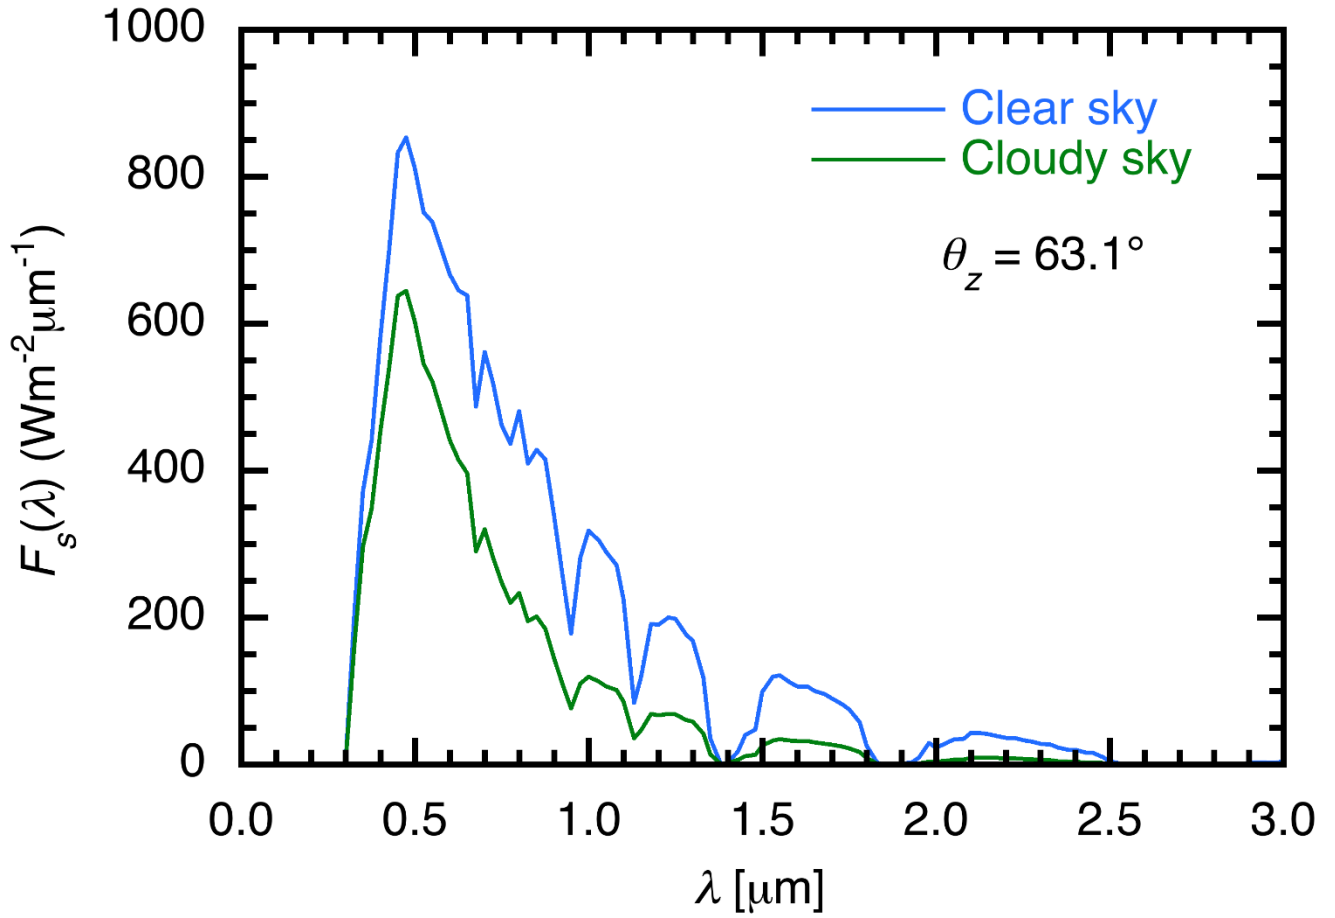

20 **Figure S1:** Spectral solar radiation  $F_s(\lambda)$  in  $\lambda = 0.2 - 3.0 \mu\text{m}$  under clear and cloudy skies at  $\theta_z = 63.1^\circ$ , simulated with a radiative transfer model for the atmosphere–snow/ice system over the bare ice surface with a spectral resolution of  $0.025 \mu\text{m}$ . In the calculation of  $\bar{k}_e(x)$ ,  $F_s(\lambda)$  in  $\lambda = 0.2 - 4.0 \mu\text{m}$  is used.

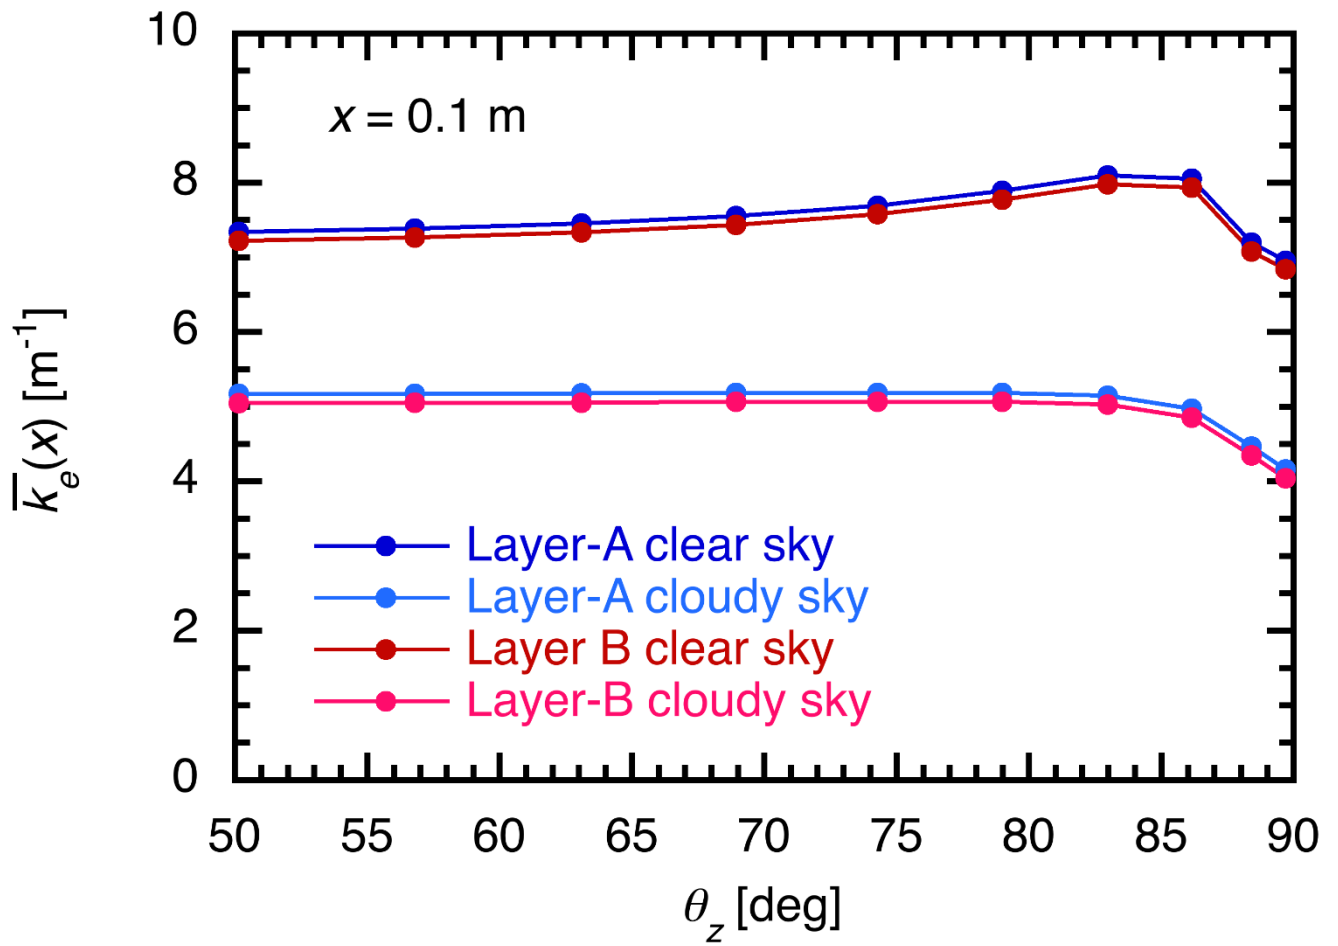

25 **Figure S2:** Broadband flux extinction coefficient  $\bar{k}_e(x)$  of bare ice as a function of  $\theta_z$  in the case of  $x = 0.1 \text{ m}$  for clear and cloudy sky conditions and employed data sets of  $k_e(\lambda)$  for Layer A and Layer B reported by Cooper et al. (2021).
